# Supplementary material for: Increased Risk of Genetic and Epigenetic Instability in Human Embryonic Stem Cells Associated with Specific Culture Conditions
Source: PLoS One. 2015 Feb 25;10(2):e0118307. doi: 10.1371/journal.pone.0118307 (PMC4340884; doi:10.1371/journal.pone.0118307)
Supplement: S1 Table — (XLSX) [file pone.0118307.s004.xlsx]

## Sheet: Sheet1
Supplementary Table 1
Assay	Passage Number
	MefMech	MefEnz	EcmMech	EcmEnz
MTT	P95	P94	P135	P148
Doubling Time	P90	P88	P126	P138
EdU incorporation	P103	P104	P149	P162
Telomerase Activity	P84	P85	P119	P69
Telomere Length	P85	P85	P119	P130
TUNEL	P54	P76	P59	P59
	MefMech	P42	P85	P103		MefEnz	P11	P26	P31	P41	P85	P104		EcmMech	P41	P119	P147		EcmEnz	P41	P130	P161
SNP Genotyping	Rep A	X				Rep A	X	X	X	X	X	X		Rep A	X	X	X		Rep A	X	X	X
	Rep B	X	X	X		Rep B	X	X	X	X		X		Rep B	X	X	X		Rep B	X	X	X
	Rep C	X	X	X		Rep C	X	X	X	X	X	X		Rep C	X	X	X		Rep C	X	X	X
	Rep D	X	X	X		Rep D	X	X	X	X		X		Rep D	X		X		Rep D	X		X
	Rep E	X		X		Rep E	X	X	X	X		X		Rep E	X		X		Rep E	X		X
	Rep F	X		X		Rep F	X	X	X	X		X		Rep F	X		X		Rep F	X		X
Gene Expression	MefMech	P2	P42	P103		MefEnz	P6	P41	P104					EcmMech	P6	P41	P147		EcmEnz	P5	P41	P161
	Rep A	X	X			Rep A	X	X	X					Rep A	X	X	X		Rep A	X	X	X
	Rep B	X	X	X		Rep B	X	X	X					Rep B	X	X	X		Rep B	X	X	X
	Rep C	X	X	X		Rep C	X	X	X					Rep C	X	X	X		Rep C	X	X	X
	Rep D	X	X	X		Rep D	X	X	X					Rep D	X	X	X		Rep D	X	X	X
	Rep E	X	X	X		Rep E	X	X	X					Rep E	X	X	X		Rep E	X	X	X
	Rep F	X	X	X		Rep F	X	X	X					Rep F	X	X	X		Rep F	X	X	X
Methylation	MefMech	P2	P41	P103		MefEnz	P6	P41	P104					EcmMech	P6	P41	P147		EcmEnz	P7	P41	P161
	Rep A					Rep A	X	X	X					Rep A	X	X	X		Rep A	X	X	X
	Rep B	X	X	X		Rep B	X	X	X					Rep B	X	X	X		Rep B	X	X	X
	Rep C	X	X	X		Rep C	X	X	X					Rep C	X	X	X		Rep C	X	X	X
	Rep D	X	X	X		Rep D								Rep D					Rep D
	Rep E					Rep E								Rep E					Rep E
	Rep F					Rep F								Rep F					Rep F
